# Supplementary material for: Interaction between Long Noncoding RNAs and Syncytin-1/Syncytin-2 Genes and Transcripts: How Noncoding RNAs May Affect Pregnancy in Patients with Systemic Lupus Erythematosus
Source: MDPI journal article supplement (doi:10.3390/ijms24032259), 2023-01-23
Supplement: s1 [file s1]

| TRANSCRIPT        | GENOMIC LOCATION      | GENE HIT        | LENGTH | SCORE | %ID  | EXPRESSION                                                                            | EXPRESSED IN PLACENTA | SUBCELLULAR LOCALISATION | ASSOCIATED GENETIC DISEASE               |
|-------------------|-----------------------|-----------------|--------|-------|------|---------------------------------------------------------------------------------------|-----------------------|--------------------------|------------------------------------------|
| ENST00000658227.1 | 6:166314937-166316243 | ENSG00000287189 | 1312   | 1650  | 90.9 | right uterine tube, olfactory segment of nasal mucosa, hypothalamus and other tissues | /                     | /                        |                                          |
| ENST00000670000.1 | 1:119180392-119181234 | WARS2-AS1       | 852    | 931   | 88.8 | ubiquitous                                                                            | NO                    | /                        | Parkinsonism-Dystonia 3, childhood-onset |
| ENST00000413763.1 | X:75903868-75904856   | ENSG00000226854 | 1012   | 765   | 83.7 | nervous system, gastrointestinal tract, glands, ovary, prostate                       | NO                    | /                        |                                          |
| ENST00000674361.1 | X:113897095-113897617 | XACT            | 524    | 700   | 91.9 | pancreas, colon, testis                                                               | NO                    | nucleolus                |                                          |
| ENST00000670000.1 | 1:119181237-119181954 | WARS2-AS1       | 718    | 672   | 86.6 | ubiquitous                                                                            | NO                    | /                        | Parkinsonism-Dystonia 3, childhood-onset |
| ENST00000670000.1 | 1:119182141-119182963 | WARS2-AS1       | 865    | 654   | 83.5 | ubiquitous                                                                            | NO                    | /                        | Parkinsonism-Dystonia 3, childhood-onset |
| ENST00000440150.5 | 1:119182141-119182963 | WARS2-AS1       | 865    | 654   | 83.5 | ubiquitous                                                                            | NO                    | /                        | Parkinsonism-Dystonia 3, childhood-onset |
| ENST00000653218.1 | 21:18759799-18760297  | MIR548XHG       | 499    | 615   | 90.5 | brain, glands, intestine, skin, testis                                                | NO                    | /                        |                                          |
| ENST00000671206.1 | 21:18759799-18760297  | MIR548XHG       | 499    | 615   | 90.5 | brain, glands, intestine, skin, testis                                                | NO                    | /                        |                                          |
| ENST00000685812.2 | 4:42285839-42286367   | ENSG00000289643 | 529    | 613   | 89.4 | /                                                                                     | /                     | /                        |                                          |
| ENST00000657223.1 | 13:69221874-69222446  | LINC00383       | 575    | 577   | 87.3 | gonad, testis, thyroid, brain                                                         | NO                    | /                        | Hepatocellular carcinoma                 |
| ENST00000669402.1 | 6:88420946-88421373   | ENSG00000234426 | 428    | 569   | 91.8 | overexpressed in whole blood                                                          | NO                    | /                        | /                                        |
| ENST00000436786.1 | 9:22823297-22823817   | LINC01239       | 523    | 569   | 88.5 | overexpressed in adipose, subcutaneous tissue and breast                              | NO                    | /                        | Fanconi anemia complementation group I   |
| ENST00000671139.1 | 2:112039378-112039935 | ENSG00000286904 | 559    | 544   | 86.5 | colonic epithelium, right adrenal gland cortex, sural nerve and other tissues         | /                     | /                        | /                                        |
| ENST00000454367.2 | 2:58275640-58276157   | LINC01795       | 526    | 502   | 87   | testis, brain, intestine, ovary, blood                                                | NO                    | /                        | /                                        |

|                   |                        |                 |     |     |      |                                                                            |    |           |   |
|-------------------|------------------------|-----------------|-----|-----|------|----------------------------------------------------------------------------|----|-----------|---|
| ENST00000655335.1 | 2:58275640-58276157    | LINC01795       | 526 | 502 | 87   | testis, brain, intestine, ovary, blood                                     | NO | /         | / |
| ENST00000605778.1 | 7:35696139-35696567    | HERPUD2-AS1     | 432 | 490 | 88.8 | ubiquitous                                                                 | NO | /         | / |
| ENST00000670606.1 | 2:75872035-75872492    | ENSG00000287474 | 459 | 486 | 88.4 | gonad, testis, pancreas and other tissues                                  | /  | /         | / |
| ENST00000674361.1 | X:113897542-113897869  | XACT            | 328 | 480 | 93.5 | pancreas, colon, testis                                                    | NO | nucleolus | / |
| ENST00000657054.1 | 12:126449360-126449808 | LINC02347       | 457 | 461 | 87.7 | ubiquitous                                                                 | NO | /         | / |
| ENST00000661190.1 | 12:126449360-126449808 | LINC02347       | 457 | 461 | 87.7 | ubiquitous                                                                 | NO | /         | / |
| ENST00000654221.1 | 12:126449360-126449808 | LINC02347       | 457 | 461 | 87.7 | ubiquitous                                                                 | NO | /         | / |
| ENST00000663153.1 | 12:126449360-126449808 | LINC02347       | 457 | 461 | 87.7 | ubiquitous                                                                 | NO | /         | / |
| ENST00000653244.1 | 12:126449360-126449808 | LINC02347       | 457 | 461 | 87.7 | ubiquitous                                                                 | NO | /         | / |
| ENST00000649476.1 | 18:57735177-57735590   | ENSG00000267787 | 415 | 453 | 88.9 | colonic epithelium, granulocytes, monocytes and other tissues              | /  | /         | / |
| ENST00000588925.5 | 18:57735177-57735590   | ENSG00000267787 | 415 | 453 | 88.9 | colonic epithelium, granulocytes, monocytes and other tissues              | /  | /         | / |
| ENST00000355189.7 | 21:18752749-18759774   | MIR548XHG       | 369 | 453 | 90.5 | brain, glands, intestine, skin, testis                                     | NO | /         |   |
| ENST00000685812.2 | 4:42292169-42292599    | ENSG00000289643 | 431 | 417 | 87.2 | /                                                                          | /  | /         | / |
| ENST00000681309.1 | 3:70617120-70617434    | ENSG00000288679 | 327 | 378 | 89.2 | /                                                                          | /  | /         | / |
| ENST00000414582.1 | 21:18752749-18753028   | MIR548XHG       | 280 | 356 | .    | brain, glands, intestine, skin, testis                                     | NO | /         |   |
| ENST00000664906.1 | 2:34732453-34732768    | ENSG00000232153 | 316 | 340 | 88.6 | adipose tissue, kidney, pancreas, testis                                   | NO | /         | / |
| ENST00000643361.1 | 1:68698450-68864146    | ENSG00000285407 | 324 | 330 | 87.9 | ventricular zone, nucleus accumbens, ganglionic eminence and other tissues | /  | /         | / |

|                   |                        |                 |     |     |      |                                                                          |    |   |   |
|-------------------|------------------------|-----------------|-----|-----|------|--------------------------------------------------------------------------|----|---|---|
| ENST00000530569.5 | 11:22317752-22318037   | SLC17A6-DT      | 286 | 289 | 87.7 | brain, muscle, gastrointestinal, glands, testis                          | NO | / | / |
| ENST00000605778.1 | 7:35696697-35697010    | HERPUD2-AS1     | 314 | 281 | 86.3 | ubiquitous                                                               | NO | / | / |
| ENST00000586729.1 | 18:57735400-57735590   | ENSG00000267787 | 191 | 259 | 92.1 | colonic epithelium, granulocyte, monocyte and other tissues              | /  | / | / |
| ENST00000656413.1 | 21:18759799-18760027   | MIR548XHG       | 229 | 255 | 89   | brain, glands, intestine, skin, testis                                   | NO | / | / |
| ENST00000681309.1 | 3:70617408-70617661    | ENSG00000288679 | 255 | 241 | 87   | /                                                                        | /  | / | / |
| ENST00000695562.1 | 13:23527872-23528172   | ENSG00000289688 | 301 | 190 | 83   | /                                                                        | /  | / | / |
| ENST00000655335.1 | 2:58275536-58275678    | LINC01795       | 144 | 186 | 91.6 | testis, brain, intestine, ovary, blood, kidney                           | NO | / | / |
| ENST00000657054.1 | 12:126449766-126449896 | LINC02347       | 132 | 180 | 92.4 | testis, brain, pancreas, intestine, breast, ovary, spleen, blood, glands | NO | / | / |
| ENST00000661190.1 | 12:126449766-126449896 | LINC02347       | 132 | 180 | 92.4 | testis, brain, pancreas, intestine, breast, ovary, spleen, blood, glands | NO | / | / |
| ENST00000654221.1 | 12:126449766-126449896 | LINC02347       | 132 | 180 | 92.4 | testis, brain, pancreas, intestine, breast, ovary, spleen, blood, glands | NO | / | / |
| ENST00000663153.1 | 12:126449766-126449896 | LINC02347       | 132 | 180 | 92.4 | testis, brain, pancreas, intestine, breast, ovary, spleen, blood, glands | NO | / | / |
| ENST00000653244.1 | 12:126449766-126449896 | LINC02347       | 132 | 180 | 92.4 | testis, brain, pancreas, intestine, breast, ovary, spleen, blood, glands | NO | / | / |

|                    |                       |                 |     |     |      |                                                                                       |     |                                                                               |                                          |
|--------------------|-----------------------|-----------------|-----|-----|------|---------------------------------------------------------------------------------------|-----|-------------------------------------------------------------------------------|------------------------------------------|
| ENST00000670000.1  | 1:119182983-119183225 | WARS2-AS1       | 246 | 178 | 84.1 | ubiquitous                                                                            | NO  | /                                                                             | Parkinsonism-Dystonia 3, childhood-onset |
| ENST00000440150.5  | 1:119182983-119183225 | WARS2-AS1       | 246 | 178 | 84.1 | ubiquitous                                                                            | NO  | /                                                                             | Parkinsonism-Dystonia 3, childhood-onset |
| ENST00000667450.1  | Y:19040249-19040543   | TTYT14          | 295 | 178 | 82.3 | ubiquitous                                                                            | YES | nucleus                                                                       | /                                        |
| ENST00000658227.1  | 6:166316268-166316382 | ENSG00000287189 | 115 | 164 | 93   | right uterine tube, olfactory segment of nasal mucosa, hypothalamus and other tissues | NO  | /                                                                             | /                                        |
| ENST00000648574.1  | 13:69222324-69222446  | LINC00383       | 124 | 164 | 91.9 | brain, testis, prostate                                                               | NO  | /                                                                             | Hepatocellular carcinoma                 |
| ENST00000444536.1  | 13:63687404-63687509  | LINC00395       | 106 | 154 | 93.3 | mainly testis                                                                         | NO  | /                                                                             | /                                        |
| ENST00000653218.1  | 21:18760222-18760312  | MIR548XHG       | 91  | 148 | 95.6 | brain, glands, intestine, skin, testis                                                | NO  | /                                                                             | /                                        |
| ENST00000671206.1  | 21:18760222-18760312  | MIR548XHG       | 91  | 148 | 95.6 | brain, glands, intestine, skin, testis                                                | NO  | /                                                                             | /                                        |
| ENST00000702094.1  | 7:87329938-87330060   | TP53TG1         | 123 | 140 | 89.4 | ubiquitous                                                                            | YES | nucleus, cytosol, mitochondrion, cytoskeleton, extracellular, plasma membrane | Glioma, lung and colorectal cancer       |
| ENST00000687819.1  | 7:87329938-87330060   | TP53TG1         | 123 | 140 | 89.4 | ubiquitous                                                                            | YES | nucleus, cytosol, mitochondrion, cytoskeleton, extracellular, plasma membrane | Glioma, lung and colorectal cancer       |
| ENST00000686297.1  | 7:87329938-87330060   | TP53TG1         | 123 | 140 | 89.4 | ubiquitous                                                                            | YES | nucleus, cytosol, mitochondrion, cytoskeleton, extracellular, plasma membrane | Glioma, lung and colorectal cancer       |
| ENST00000359941.11 | 7:87329938-87330060   | TP53TG1         | 123 | 140 | 89.4 | ubiquitous                                                                            | YES | nucleus, cytosol, mitochondrion, cytoskeleton, extracellular, plasma membrane | Glioma, lung and colorectal cancer       |
| ENST00000566193.1  | Y:19694443-19694603   | ENSG00000260197 | 162 | 136 | 85.8 | ubiquitous                                                                            | NO  | /                                                                             | /                                        |
| ENST00000453774.2  | 2:34732453-34737321   | LINC01320       | 106 | 130 | 90.5 | kidney, testis, pancreas, uterus,                                                     | NO  | /                                                                             | /                                        |

|                   |                     |           |     |     |      |                                                                    |    |   |   |
|-------------------|---------------------|-----------|-----|-----|------|--------------------------------------------------------------------|----|---|---|
|                   |                     |           |     |     |      | brain, heart,<br>intestine                                         |    |   |   |
| ENST00000671356.1 | 2:34732453-34737321 | LINC01320 | 106 | 130 | 90.5 | kidney, testis,<br>pancreas, uterus,<br>brain, heart,<br>intestine | NO | / | / |
| ENST00000665109.1 | 2:34732453-34737321 | LINC01320 | 106 | 130 | 90.5 | kidney, testis,<br>pancreas, uterus,<br>brain, heart,<br>intestine | NO | / | / |
| ENST00000664286.1 | 2:34732453-34737321 | LINC01320 | 106 | 130 | 90.5 | kidney, testis,<br>pancreas, uterus,<br>brain, heart,<br>intestine | NO | / | / |
| ENST00000621006.1 | 2:34732453-34737321 | LINC01320 | 106 | 130 | 90.5 | kidney, testis,<br>pancreas, uterus,<br>brain, heart,<br>intestine | NO | / | / |
| ENST00000658168.1 | 2:34732453-34737321 | LINC01320 | 106 | 130 | 90.5 | kidney, testis,<br>pancreas, uterus,<br>brain, heart,<br>intestine | NO | / | / |
| ENST00000603129.6 | 2:34732453-34737321 | LINC01320 | 106 | 130 | 90.5 | kidney, testis,<br>pancreas, uterus,<br>brain, heart,<br>intestine | NO | / | / |
| ENST00000671252.1 | 2:34732453-34737321 | LINC01320 | 106 | 130 | 90.5 | kidney, testis,<br>pancreas, uterus,<br>brain, heart,<br>intestine | NO | / | / |
| ENST00000627270.2 | 2:34732453-34737321 | LINC01320 | 106 | 130 | 90.5 | kidney, testis,<br>pancreas, uterus,<br>brain, heart,<br>intestine | NO | / | / |
| ENST00000626601.2 | 2:34732453-34737321 | LINC01320 | 106 | 130 | 90.5 | kidney, testis,<br>pancreas, uterus,<br>brain, heart,<br>intestine | NO | / | / |
| ENST00000616475.4 | 2:34732453-34737321 | LINC01320 | 106 | 130 | 90.5 | kidney, testis,<br>pancreas, uterus,<br>brain, heart,<br>intestine | NO | / | / |
| ENST00000626008.2 | 2:34732453-34737321 | LINC01320 | 106 | 130 | 90.5 | kidney, testis,<br>pancreas, uterus,                               | NO | / | / |

|                   |                      |                 |     |      |      |                                                                                                   |     |                                                                                           |                                       |
|-------------------|----------------------|-----------------|-----|------|------|---------------------------------------------------------------------------------------------------|-----|-------------------------------------------------------------------------------------------|---------------------------------------|
|                   |                      |                 |     |      |      | brain, heart,<br>intestine                                                                        |     |                                                                                           |                                       |
| ENST00000429137.1 | 6:88420946-88421031  | ENSG00000234426 | 86  | 130  | 94.1 | ubiquitous                                                                                        | NO  | /                                                                                         | /                                     |
| ENST00000628407.2 | 2:34732453-34732557  | LINC01320       | 105 | 128  | 90.4 | kidney, testis,<br>pancreas, uterus,<br>brain, heart,<br>intestine                                | NO  | /                                                                                         | /                                     |
| ENST00000625995.2 | 2:34732453-34732557  | LINC01320       | 105 | 128  | 90.4 | kidney, testis,<br>pancreas, uterus,<br>brain, heart,<br>intestine                                | NO  | /                                                                                         | /                                     |
| ENST00000433664.1 | 13:69222349-69222446 | LINC00383       | 99  | 123  | 90.9 | right uterine tube,<br>olfactory segment<br>of nasal mucosa,<br>hypothalamus and<br>other tissues | /   | /                                                                                         | /                                     |
| ENST00000413763.1 | X:75903105-75903175  | ENSG00000226854 | 72  | 109  | 94.4 | brain, gonads,<br>glands, intestine                                                               | NO  | /                                                                                         | /                                     |
| ENST00000695562.1 | 13:23527417-23527535 | ENSG00000289688 | 119 | 109  | 86.5 | /                                                                                                 | /   | /                                                                                         | /                                     |
| ENST00000661265.1 | 3:70617766-70617836  | ENSG00000287669 | 71  | 109  | 94.3 | /                                                                                                 | /   | /                                                                                         | /                                     |
| ENST00000695562.1 | 13:23528606-23528775 | ENSG00000289688 | 170 | 107  | 82.9 | /                                                                                                 | /   | /                                                                                         | /                                     |
| ENST00000690980.1 | 7:87329938-87330031  | TP53TG1         | 94  | 107  | 89.3 | ubiquitous                                                                                        | YES | nucleus, cytosol,<br>mitochondrion,<br>cytoskeleton,<br>extracellular, plasma<br>membrane | Glioma, lung and colorectal<br>cancer |
| ENST00000444770.1 | 10:63664664-63664770 | ENSG00000228566 | 107 | 107  | 86.9 | ubiquitous                                                                                        | NO  | /                                                                                         | /                                     |
| ENST00000605778.1 | 7:35696529-35696701  | HERPUD2-AS1     | 181 | 105  | 82.3 | ubiquitous                                                                                        | NO  | /                                                                                         | /                                     |
| ENST00000657223.1 | 13:69221866-69221946 | LINC00383       | 82  | 103  | 91.4 | right uterine tube,<br>olfactory segment<br>of nasal mucosa,<br>hypothalamus and<br>other tissues | /   | /                                                                                         | /                                     |
| ENST00000695562.1 | 13:23525374-23525565 | ENSG00000289688 | 192 | 97.4 | 81.7 | /                                                                                                 | /   | /                                                                                         | /                                     |
| ENST00000444536.1 | 13:63687493-63714355 | LINC00395       | 67  | 93.4 | 92.5 | mainly testis                                                                                     | NO  | /                                                                                         | /                                     |

|                   |                        |                 |     |      |      |                                                                          |    |   |                                          |
|-------------------|------------------------|-----------------|-----|------|------|--------------------------------------------------------------------------|----|---|------------------------------------------|
| ENST00000623391.1 | 22:15287138-15287367   | ENSG00000280341 | 232 | 93.4 | 79.3 | pancreas, cortical plate, blood and other tissues                        | /  | / | /                                        |
| ENST00000623391.1 | 22:15286984-15287089   | ENSG00000280341 | 106 | 91.4 | 85.8 | pancreas, cortical plate, blood and other tissues                        | /  | / | /                                        |
| ENST00000664067.1 | 1:205858319-205868833  | ENSG00000286619 | 66  | 91.4 | 92.4 | esophagus, brain, pancreas and other tissues                             | /  | / | /                                        |
| ENST00000538329.1 | 12:14220974-14221112   | ENSG00000256084 | 140 | 77.6 | 82.1 | ubiquitous                                                               | NO | / | /                                        |
| ENST00000660850.1 | 2:58276096-58276157    | LINC01795       | 62  | 75.6 | 90.3 | testis, brain, intestine, ovary, blood, kidney                           | NO | / | /                                        |
| ENST00000670000.1 | 1:119183198-119183268  | WARS2-AS1       | 81  | 73.6 | 83.9 | ubiquitous                                                               | NO |   | Parkinsonism-Dystonia 3, childhood-onset |
| ENST00000440150.5 | 1:119183198-119183268  | WARS2-AS1       | 81  | 73.6 | 83.9 | ubiquitous                                                               | NO |   | Parkinsonism-Dystonia 3, childhood-onset |
| ENST00000685812.2 | 4:42292572-42292644    | ENSG00000289643 | 83  | 69.7 | 83.1 | /                                                                        | /  | / | /                                        |
| ENST00000454367.2 | 2:58275640-58275678    | LINC01795       | 39  | 69.7 | 97.4 | testis, brain, intestine, ovary, blood, kidney                           | NO | / | /                                        |
| ENST00000664906.1 | 2:34732421-34732466    | ENSG00000232153 | 47  | 67.7 | 93.6 | testis, adipocytes, kidney                                               | NO | / | /                                        |
| ENST00000621006.1 | 2:34732421-34732466    | LINC01320       | 47  | 67.7 | 93.6 | kidney, testis, pancreas, uterus, brain, heart, intestine                | NO | / | /                                        |
| ENST00000702818.1 | 11:110328463-110328521 | ENSG00000290078 | 59  | 67.7 | 89.8 | /                                                                        | /  | / | /                                        |
| ENST00000685812.2 | 4:42292109-42292172    | ENSG00000289643 | 64  | 63.8 | 87.5 | /                                                                        | /  | / | /                                        |
| ENST00000436786.1 | 9:22823252-22823291    | LINC01239       | 40  | 63.8 | 95   | ubiquitous, overexpressed in adipose, subcutaneous and mammary tissue    | NO | / | /                                        |
| ENST00000657054.1 | 12:126449284-126449319 | LINC02347       | 36  | 63.8 | 97.2 | testis, brain, pancreas, intestine, breast, ovary, spleen, blood, glands | NO | / | /                                        |

|                   |                        |           |    |      |      |                                                                          |    |   |   |
|-------------------|------------------------|-----------|----|------|------|--------------------------------------------------------------------------|----|---|---|
| ENST00000661190.1 | 12:126449284-126449319 | LINC02347 | 36 | 63.8 | 97.2 | testis, brain, pancreas, intestine, breast, ovary, spleen, blood, glands | NO | / | / |
| ENST00000654221.1 | 12:126449284-126449319 | LINC02347 | 36 | 63.8 | 97.2 | testis, brain, pancreas, intestine, breast, ovary, spleen, blood, glands | NO | / | / |

---
