# Supplementary material for: Interaction between Long Noncoding RNAs and Syncytin-1/Syncytin-2 Genes and Transcripts: How Noncoding RNAs May Affect Pregnancy in Patients with Systemic Lupus Erythematosus
Source: MDPI journal article supplement (doi:10.3390/ijms24032259), 2023-01-23
Supplement: s1 [file s1]

| TRANSCRIPT        | GENOMIC LOCATION                 | GENE HIT        | LENGTH | SCORE | %ID  | EXPRESSION                            | EXPRESSED<br>IN<br>PLACENTA | SUBCELLULAR<br>LOCALIZATION | ASSOCIATED DISEASE |
|-------------------|----------------------------------|-----------------|--------|-------|------|---------------------------------------|-----------------------------|-----------------------------|--------------------|
| ENST00000663151.1 | 2:828293-829246                  | LINC01115       | 985    | 346   | 79.2 | ubiquitous                            | NO                          | /                           | /                  |
| ENST00000659656.1 | 2:828293-829246                  | LINC01115       | 985    | 346   | 79.2 | ubiquitous                            | NO                          | /                           | /                  |
| ENST00000649319.1 | 7:153396140-153396818            | ENSG00000285524 | 702    | 265   | 79.7 | muscle, heart                         | NO                          | /                           | /                  |
| ENST00000471537.3 | 3:42897057-42897334              | ENSG00000273328 | 281    | 233   | 85.7 | liver, placenta, nerves               | YES                         | /                           | /                  |
| ENST00000471537.3 | 3:42897475-42898063              | ENSG00000273328 | 604    | 233   | 79.9 | liver, placenta, nerves               | YES                         | /                           | /                  |
| ENST00000659515.1 | 8:68307367-68307715              | C8orf34-AS1     | 352    | 233   | 83.5 | ubiquitous                            | NO                          | /                           | /                  |
| ENST00000496604.5 | 3:42897057-42897324              | ENSG00000273328 | 271    | 213   | 85.2 | liver, placenta, nerves               | YES                         | /                           | /                  |
| ENST00000471537.3 | 3:42898080-42898361              | ENSG00000273328 | 286    | 210   | 84.6 | liver, placenta, nerves               | YES                         | /                           | /                  |
| ENST00000683405.1 | 3:46001123-46001283              | ENSG00000288717 | 161    | 184   | 89.4 | /                                     | /                           | /                           | /                  |
| ENST00000627700.2 | X:98864789-98864966              | ENSG00000281566 | 180    | 164   | 87.2 | monocytes, muscles,<br>lymph nodes    | /                           | /                           | /                  |
| ENST00000626665.3 | X:98864789-98864966              | ENSG00000281566 | 180    | 164   | 87.2 | monocytes, muscles,<br>lymph nodes    | /                           | /                           | /                  |
| ENST00000654670.1 | 4:117360610-117360807            | LINC02263       | 199    | 154   | 84.9 | brain, testis                         | NO                          | /                           | /                  |
| ENST00000668339.1 | 4:117360610-117360807            | LINC02263       | 199    | 154   | 84.9 | brain, testis                         | NO                          | /                           | /                  |
| ENST00000444770.1 | 10:63990452-63990568             | ENSG00000228566 | 117    | 152   | 91.4 | monocytes, muscles,<br>lymph nodes    | NO                          | /                           | /                  |
| ENST00000695939.1 | 2:216886423-216886752            | DIRC3-AS1       | 333    | 150   | 81.0 | ubiquitous                            | NO                          | /                           | /                  |
| ENST00000674361.1 | X:113893884-113894222            | XACT            | 347    | 150   | 80.6 | pancreas, colon, testis               | NO                          | nucleolus                   | /                  |
| ENST00000666918.1 | 4:117360650-117360807            | LINC02263       | 159    | 146   | 86.7 | brain, testis                         | NO                          | /                           | /                  |
| ENST00000654527.1 | 4:117360650-117360807            | LINC02263       | 159    | 146   | 86.7 | brain, testis                         | NO                          | /                           | /                  |
| ENST00000655906.1 | 4:117360650-117360807            | LINC02263       | 159    | 146   | 86.7 | brain, testis                         | NO                          | /                           | /                  |
| ENST00000656442.1 | 4:117360650-117360807            | LINC02263       | 159    | 146   | 86.7 | brain, testis                         | NO                          | /                           | /                  |
| ENST00000420701.6 | 4:117360650-117360807            | LINC02263       | 159    | 146   | 86.7 | brain, testis                         | NO                          | /                           | /                  |
| ENST00000471537.3 | 3:42898974-42899153              | ENSG00000273328 | 183    | 119   | 83.0 | liver, placenta, nerves               | YES                         | /                           | /                  |
| ENST00000595201.2 | 19:48214214-48214420             | ENSG00000268583 | 207    | 117   | 82.1 | mostly whole blood                    | NO                          | /                           | /                  |
| ENST00000426240.5 | 4:117360666-117360807            | LINC02263       | 143    | 115   | 85.3 | brain, testis                         | NO                          | /                           | /                  |
| ENST00000586185.2 | 17:78618599-78618799             | SCAT1           | 203    | 115   | 82.2 | bone marrow, nerves,<br>tendons       | NO                          | /                           | Esophageal cancer  |
| ENST00000663810.1 | 1:224608766-224608878            | CNIH3-AS2       | 113    | 105   | 86.7 | endometrium, brain                    | NO                          | /                           | /                  |
| ENST00000437416.3 | 1:224608766-224608878            | CNIH3-AS2       | 113    | 105   | 86.7 | endometrium, brain                    | NO                          | /                           | /                  |
| ENST00000629723.2 | 3:40289892-40290229              | EIF1B-AS1       | 343    | 99.3  | 78.7 | gonads, endothelium,<br>colon         | /                           | /                           | /                  |
| ENST00000668649.1 | 14:95573600-95573834             | LINC02318       | 237    | 97.4  | 80.5 | nerves, testis                        | NO                          | /                           | /                  |
| ENST00000668165.1 | 14:95573600-95573834             | LINC02318       | 237    | 97.4  | 80.5 | nerves, testis                        | NO                          | /                           | /                  |
| ENST00000656081.1 | 5:1349805-1349999                | ENSG00000286388 | 200    | 95.4  | 81.0 | brain, heart                          | /                           | /                           | /                  |
| ENST00000522213.5 | 8:8782246-8782432                | ENSG00000254367 | 191    | 95.4  | 81.6 | overexpressed in testis<br>and spleen | NO                          | /                           | /                  |
| ENST00000643688.1 | CHR_HG76_PATCH:11174294-11174480 | ENSG00000284943 | 191    | 95.4  | 81.6 | /                                     | /                           | /                           | /                  |
| ENST00000653972.1 | 21:23423217-23423347             | D21S2088E       | 132    | 93.4  | 84.0 | brain, testis                         | NO                          | /                           | /                  |

|                   |                        |                 |     |      |      |                                   |    |                     |                                                                                     |
|-------------------|------------------------|-----------------|-----|------|------|-----------------------------------|----|---------------------|-------------------------------------------------------------------------------------|
| ENST00000538640.2 | 12:27708128-27708249   | ENSG00000256504 | 123 | 89.5 | 84.5 | ubiquitous                        | NO | /                   | /                                                                                   |
| ENST00000438428.1 | 1:181182073-181182181  | LINC01732       | 112 | 87.5 | 85.7 | vessels, respiratory epithelium   | NO | /                   | /                                                                                   |
| ENST00000435023.1 | 1:181182073-181182181  | LINC01732       | 112 | 87.5 | 85.7 | vessels, respiratory epithelium   | NO | /                   | /                                                                                   |
| ENST00000657102.1 | 16:50887400-50893661   | LINC02128       | 79  | 83.5 | 88.6 | liver, myometrium                 | NO | /                   | /                                                                                   |
| ENST00000664253.1 | 5:60701691-60701908    | ENSG00000287434 | 224 | 79.6 | 78.5 | nerves, bone marrow               | /  | /                   | /                                                                                   |
| ENST00000663810.1 | 1:224608908-224609146  | CNIH3-AS2       | 246 | 75.6 | 79.2 | endometrium, brain                | NO | /                   | /                                                                                   |
| ENST00000437416.3 | 1:224608908-224609146  | CNIH3-AS2       | 246 | 75.6 | 79.2 | endometrium, brain                | NO | /                   | /                                                                                   |
| ENST00000667398.1 | 19:31588381-31588426   | THEG5           | 46  | 75.6 | 95.6 | mostly testis                     | /  | /                   | /                                                                                   |
| ENST00000656632.1 | 19:31588381-31588426   | THEG5           | 46  | 75.6 | 95.6 | mostly testis                     | /  | /                   | /                                                                                   |
| ENST00000562167.1 | 19:31588381-31588426   | ENSG00000261400 | 46  | 75.6 | 95.6 | gonads, brain                     | /  | /                   | /                                                                                   |
| ENST00000507156.1 | 4:71821376-71821491    | ENSG00000248567 | 116 | 71.7 | 82.7 | blood, brain, testis              | NO | /                   | /                                                                                   |
| ENST00000670475.1 | 13:63437551-63437663   | ENSG00000287996 | 114 | 71.7 | 83.3 | mostly brain, glands              | /  | /                   | /                                                                                   |
| ENST00000654836.1 | 21:20777519-20777617   | LINC00320       | 99  | 69.7 | 83.8 | mostly brain                      | NO | nucleus, peroxisome | Malignant glioma                                                                    |
| ENST00000654808.1 | 10:52975808-53022889   | LINC02672       | 73  | 69.7 | 87.6 | mostly uterus and glands          | NO | /                   | /                                                                                   |
| ENST00000668157.1 | 10:52975808-53022889   | LINC02672       | 73  | 69.7 | 87.6 | mostly uterus and glands          | NO | /                   | /                                                                                   |
| ENST00000456446.1 | 2:181425536-181425696  | ENSG00000226681 | 165 | 67.7 | 80.6 | testis                            | NO | /                   | /                                                                                   |
| ENST00000688783.1 | 5:27476261-27476353    | PURPL           | 93  | 65.7 | 83.8 | endometrium, colon                | NO | nucleus             | Colon cancer, congenital myasthenia, thoracic aortic aneurysm, retinitis pigmentosa |
| ENST00000654800.1 | 7:10085338-10085398    | ENSG00000287409 | 61  | 65.7 | 88.5 | nerves, endometrium               | /  | /                   | /                                                                                   |
| ENST00000626665.3 | X:98865293-98865376    | ENSG00000281566 | 85  | 63.8 | 84.7 | monocytes, lymph node             | /  | /                   | /                                                                                   |
| ENST00000656094.1 | 8:124962349-124962469  | LINC00964       | 121 | 59.8 | 80.1 | testis and prostate               | NO | /                   | /                                                                                   |
| ENST00000657673.1 | 14:95573600-95577429   | LINC02318       | 86  | 59.8 | 83.7 | nerves, testis                    | NO | /                   | /                                                                                   |
| ENST00000659262.1 | 14:95573600-95577429   | LINC02318       | 86  | 59.8 | 83.7 | nerves, testis                    | NO | /                   | /                                                                                   |
| ENST00000556346.1 | 14:95573600-95573684   | LINC02318       | 85  | 57.8 | 83.5 | nerves, testis                    | NO | /                   | /                                                                                   |
| ENST00000663151.1 | 2:828107-828146        | LINC01115       | 40  | 55.9 | 92.5 | pituitary gland                   | NO | /                   | /                                                                                   |
| ENST00000659656.1 | 2:828107-828146        | LINC01115       | 40  | 55.9 | 92.5 | pituitary gland                   | NO | /                   | /                                                                                   |
| ENST00000610630.1 | 12:118430186-118430264 | ENSG00000275409 | 79  | 55.9 | 83.5 | brain                             | NO | /                   | /                                                                                   |
| ENST00000659493.1 | 18:58808473-58808516   | LINC01926       | 44  | 55.9 | 90.9 | prostate, bone marrow, lymph node | NO | /                   | /                                                                                   |
| ENST00000654139.1 | 14:95573600-95577429   | LINC02318       | 84  | 55.9 | 83.3 | nerves, testis                    | NO | /                   | /                                                                                   |
| ENST00000666470.1 | 14:95573600-95577429   | LINC02318       | 84  | 55.9 | 83.3 | nerves, testis                    | NO | /                   | /                                                                                   |
| ENST00000660299.1 | 14:95573600-95577429   | LINC02318       | 84  | 55.9 | 83.3 | nerves, testis                    | NO | /                   | /                                                                                   |
| ENST00000654721.1 | 14:95573600-95577429   | LINC02318       | 84  | 55.9 | 83.3 | nerves, testis                    | NO | /                   | /                                                                                   |
| ENST00000656453.1 | 14:95573600-95577429   | LINC02318       | 84  | 55.9 | 83.3 | nerves, testis                    | NO | /                   | /                                                                                   |
| ENST00000667101.1 | 14:95573600-95577429   | LINC02318       | 84  | 55.9 | 83.3 | nerves, testis                    | NO | /                   | /                                                                                   |
| ENST00000671217.1 | 14:95573600-95577429   | LINC02318       | 84  | 55.9 | 83.3 | nerves, testis                    | NO | /                   | /                                                                                   |
| ENST00000663502.1 | 14:95573600-95577429   | LINC02318       | 84  | 55.9 | 83.3 | nerves, testis                    | NO | /                   | /                                                                                   |
| ENST00000667398.1 | 19:31588234-31588336   | THEG5           | 104 | 53.9 | 81.7 | mostly testis                     | /  | /                   | /                                                                                   |

|                   |                        |                 |     |      |      |                             |     |                                      |                            |
|-------------------|------------------------|-----------------|-----|------|------|-----------------------------|-----|--------------------------------------|----------------------------|
| ENST00000656632.1 | 19:31588234-31588336   | THEG5           | 104 | 53.9 | 81.7 | mostly testis               | /   | /                                    | /                          |
| ENST00000562167.1 | 19:31588234-31588336   | ENSG00000261400 | 104 | 53.9 | 81.7 | gonads                      | /   | /                                    | /                          |
| ENST00000670434.1 | 1:4412146-4412244      | LINC01777       | 100 | 53.9 | 82.0 | bone marrow, nerves, testis | NO  | /                                    | /                          |
| ENST00000668086.1 | 1:4412146-4412244      | LINC01777       | 100 | 53.9 | 82.0 | bone marrow, nerves, testis | NO  | /                                    | /                          |
| ENST00000659315.1 | 1:4412146-4412244      | LINC01777       | 100 | 53.9 | 82.0 | bone marrow, nerves, testis | NO  | /                                    | /                          |
| ENST00000633821.2 | 1:4412146-4412244      | LINC01777       | 100 | 53.9 | 82.0 | bone marrow, nerves, testis | NO  | /                                    | /                          |
| ENST00000665284.1 | 1:4412146-4412244      | LINC01777       | 100 | 53.9 | 82.0 | bone marrow, nerves, testis | NO  | /                                    | /                          |
| ENST00000671656.1 | 1:4412146-4412244      | LINC01777       | 100 | 53.9 | 82.0 | bone marrow, nerves, testis | NO  | /                                    | /                          |
| ENST00000663417.1 | 1:4412146-4412244      | LINC01777       | 100 | 53.9 | 82.0 | bone marrow, nerves, testis | NO  | /                                    | /                          |
| ENST00000669931.1 | 1:4412146-4412244      | LINC01777       | 100 | 53.9 | 82.0 | bone marrow, nerves, testis | NO  | /                                    | /                          |
| ENST00000635312.2 | 1:4412146-4412244      | LINC01777       | 100 | 53.9 | 82.0 | bone marrow, nerves, testis | NO  | /                                    | /                          |
| ENST00000423197.2 | 1:4412146-4412244      | LINC01777       | 100 | 53.9 | 82.0 | bone marrow, nerves, testis | NO  | /                                    | /                          |
| ENST00000635002.1 | 1:4412146-4412244      | LINC01777       | 100 | 53.9 | 82.0 | bone marrow, nerves, testis | NO  | /                                    | /                          |
| ENST00000666295.1 | 14:95573600-95573654   | LINC02318       | 55  | 53.9 | 87.2 | nerves, testis              | NO  | /                                    | /                          |
| ENST00000668634.1 | 14:95573600-95573654   | LINC02318       | 55  | 53.9 | 87.2 | nerves, testis              | NO  | /                                    | /                          |
| ENST00000664519.1 | X:142739904-142739946  | ENSG00000288098 | 43  | 53.9 | 90.6 | testis                      | /   | /                                    | /                          |
| ENST00000663739.1 | 13:82778504-82778558   | ENSG00000286385 | 56  | 53.9 | 87.5 | pancreas, nerves, liver     | /   | /                                    | /                          |
| ENST00000689870.1 | 11:115582465-115582507 | ENSG00000255689 | 43  | 51.9 | 90.6 | muscle, nerves              | NO  | /                                    | /                          |
| ENST00000306533.8 | 11:115582465-115582507 | ENSG00000255689 | 43  | 51.9 | 90.6 | muscle, nerves              | NO  | /                                    | /                          |
| ENST00000661943.3 | 7:87323719-87323756    | TP53TG1         | 38  | 51.9 | 92.1 | ubiquitous                  | YES | nucleus, mitochondrion, cytoskeleton | Lung and colorectal cancer |
| ENST00000661539.1 | 8:57219421-57219482    | LINC01606       | 63  | 51.9 | 85.7 | testis                      | NO  | /                                    | /                          |
| ENST00000654770.1 | 8:57219421-57219482    | LINC01606       | 63  | 51.9 | 85.7 | testis                      | NO  | /                                    | /                          |
| ENST00000657454.1 | 8:57219421-57219482    | LINC01606       | 63  | 51.9 | 85.7 | testis                      | NO  | /                                    | /                          |
| ENST00000661856.1 | 8:57219421-57219482    | LINC01606       | 63  | 51.9 | 85.7 | testis                      | NO  | /                                    | /                          |
| ENST00000519241.6 | 8:57219421-57219482    | LINC01606       | 63  | 51.9 | 85.7 | testis                      | NO  | /                                    | /                          |
| ENST00000517611.1 | 8:57219421-57219482    | LINC01606       | 63  | 51.9 | 85.7 | testis                      | NO  | /                                    | /                          |
| ENST00000519160.5 | 8:57219421-57219482    | LINC01606       | 63  | 51.9 | 85.7 | testis                      | NO  | /                                    | /                          |
| ENST00000521132.1 | 8:57219421-57219482    | LINC01606       | 63  | 51.9 | 85.7 | testis                      | NO  | /                                    | /                          |
| ENST00000520929.1 | 8:57219421-57219482    | LINC01606       | 63  | 51.9 | 85.7 | testis                      | NO  | /                                    | /                          |
| ENST00000655105.1 | 8:57219421-57219482    | LINC01606       | 63  | 51.9 | 85.7 | testis                      | NO  | /                                    | /                          |
